# Supplementary material for: Scaling of cerebral blood perfusion in primates and marsupials
Source: Oxford University Press journal article supplement (doi:10.1242/jeb.124826), 2015-01-01
Supplement: jeb124826supp.pdf [file jeb124826supp.pdf]

## **Table S1**

[Click here to Download Table S1](#)
